# Supplementary material for: Solid polymer electrolyte based on ionic bond or covalent bond functionalized silica nanoparticles
Source: Royal Society of Chemistry journal article supplement (doi:10.1039/c7ra08471d), 2017-01-01
Supplement: c7ra08471d1.pdf [file c7ra08471d1.pdf]

*Supporting Information*

**Solid polymer electrolyte based on ionic bond or covalent bond functionalized silica nanoparticles**

Ji Hu,<sup>[a, b]</sup> Wanhui Wang,<sup>[c]</sup> Ronghua Yu,<sup>[a]</sup> Mengke Guo,<sup>[a]</sup> Chengen He,<sup>[a]</sup> Xiaolin Xie,<sup>\*[a]</sup> Haiyan Peng<sup>[a]</sup> and Zhigang Xue<sup>\*[a]</sup>

[a] The Key Laboratory for Material Chemistry of Energy Conversion and Storage, Ministry of Education; School of Chemistry and Chemical Engineering, Huazhong University of Science and Technology, Wuhan, Hubei, 430074, China.

[b] School of Materials Science and Engineering, Luoyang Institute of Science and Technology, Luoyang, Henan, 471023, China.

[c] School of Environmental Engineering and Chemistry, Luoyang Institute of Science and Technology, Luoyang, Henan, 471023, China.

\*Corresponding author E-mail: zgxue@mail.hust.edu.cn, xlxie@mail.hust.edu.cn

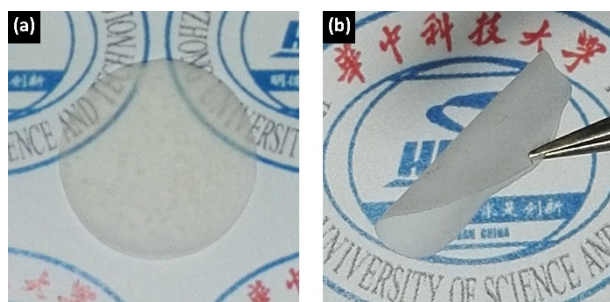

Fig. S1 Digital photographs of CPEs prepared in the study.

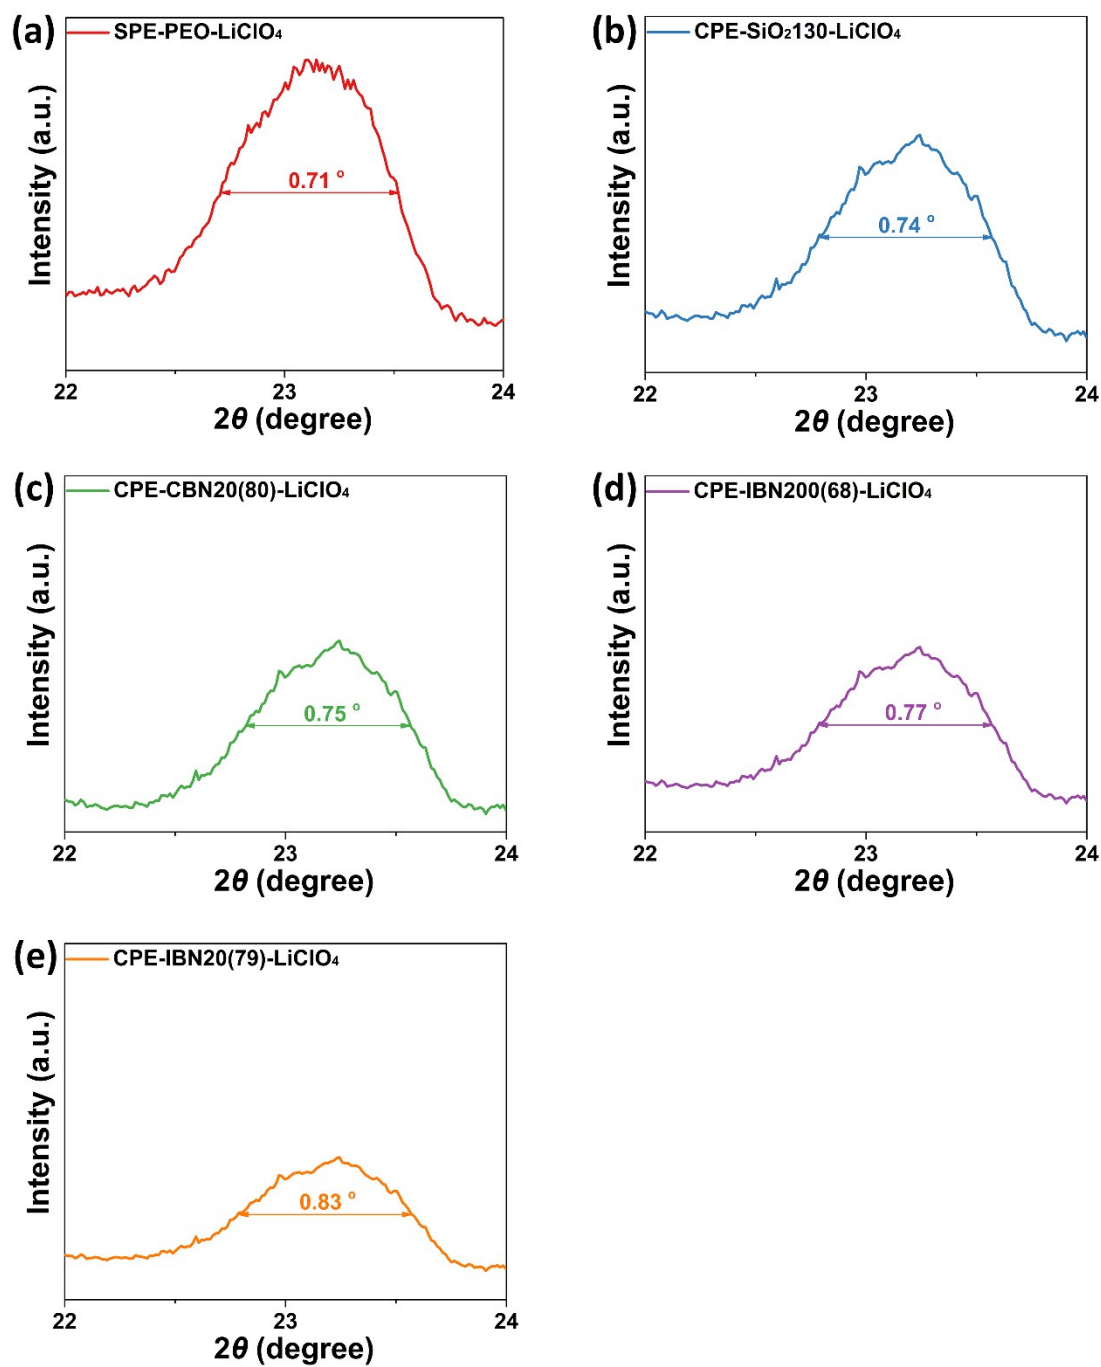

Fig. S2 XRD patterns with FWHM values of the diffraction peak between  $2\theta = 12^\circ$  and  $25^\circ$  shown in inset for (a) SPE-PEO-LiClO<sub>4</sub>, (b) CPE-SiO<sub>2</sub>130-LiClO<sub>4</sub>, (c) CPE-CBN20(80)-LiClO<sub>4</sub>, (d) CPE-IBN200(68)-LiClO<sub>4</sub> and (e) CPE-IBN20(79)-LiClO<sub>4</sub>.

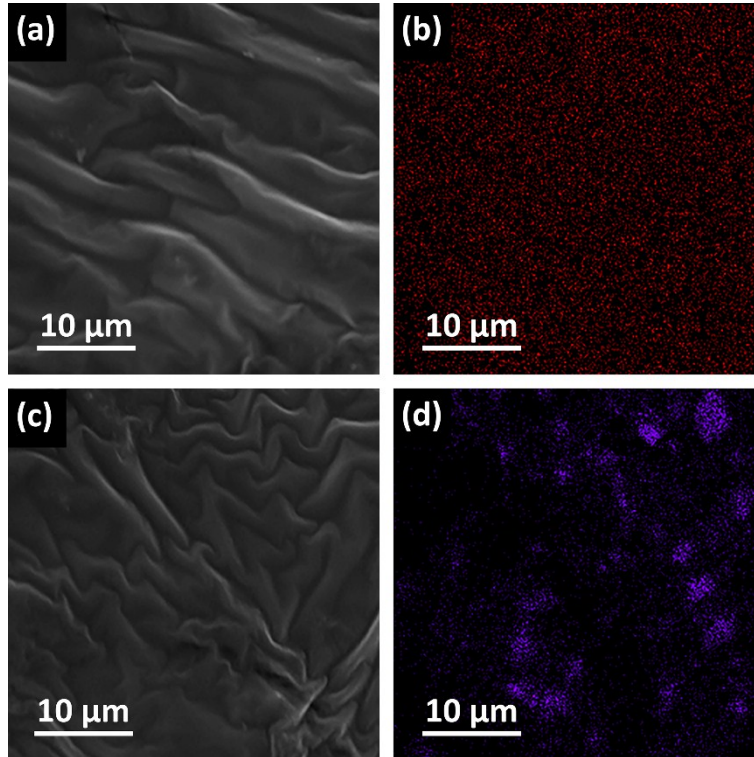

Fig. S3 (a) SEM image of CPE-IBN200(68)-LiClO<sub>4</sub>, (b) EDX map for the Si atom in CPE-IBN200(68)-LiClO<sub>4</sub>, (c) SEM image of CPE-SiO<sub>2</sub>130-LiClO<sub>4</sub> and (d) EDX map for the Si atom in CPE-SiO<sub>2</sub>130-LiClO<sub>4</sub>.

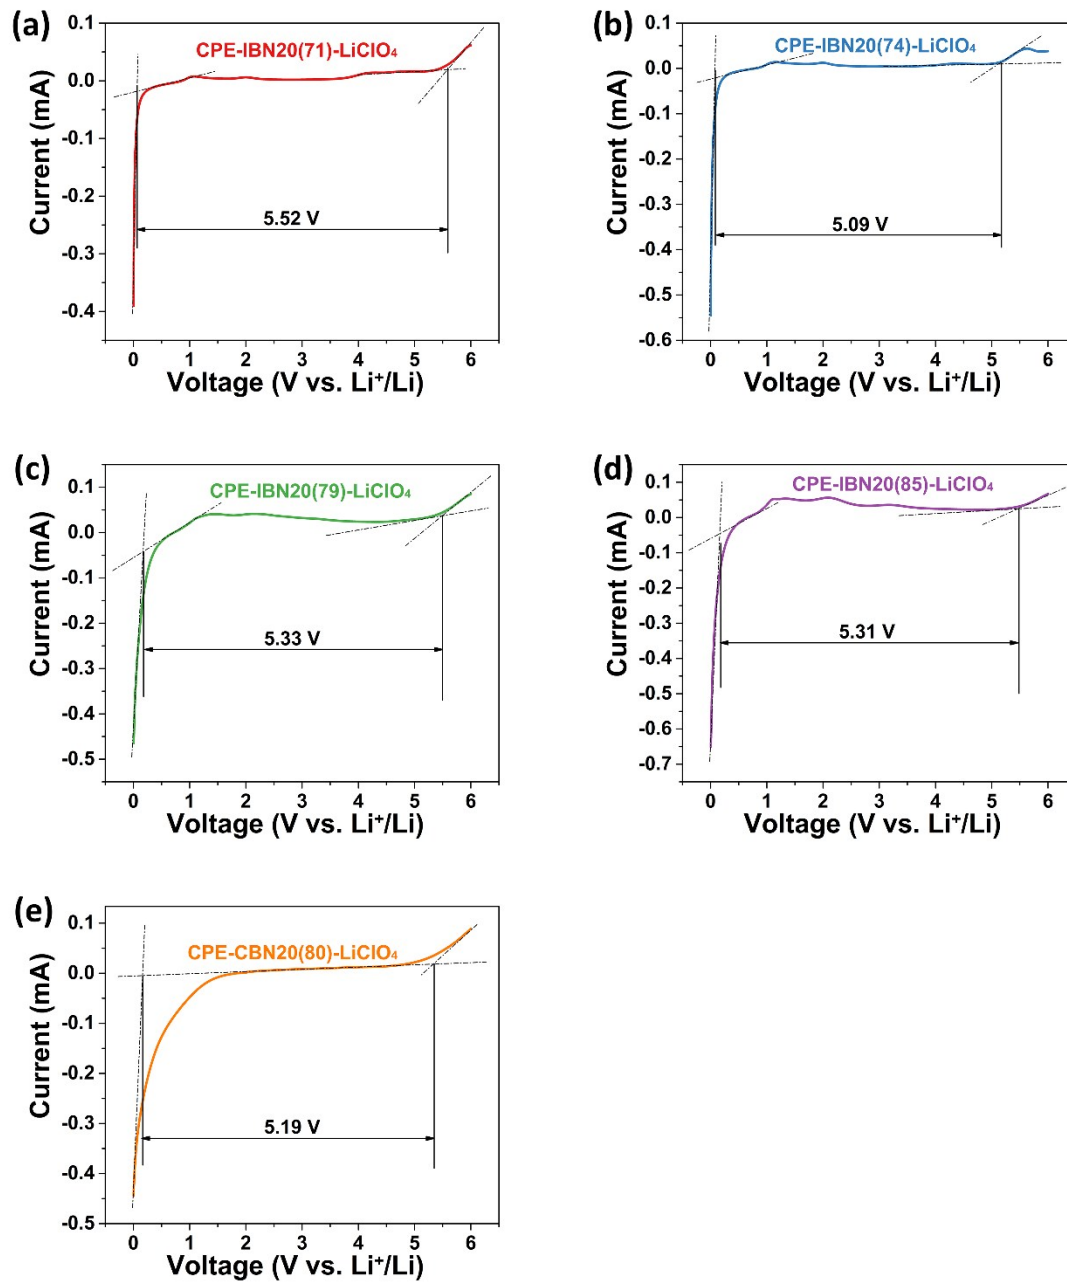

Fig. S4 Line Scans Voltammetry of CPEs (Li|CPE|SS) with a scan rate of 10 mV s<sup>-1</sup> at 50 °C.

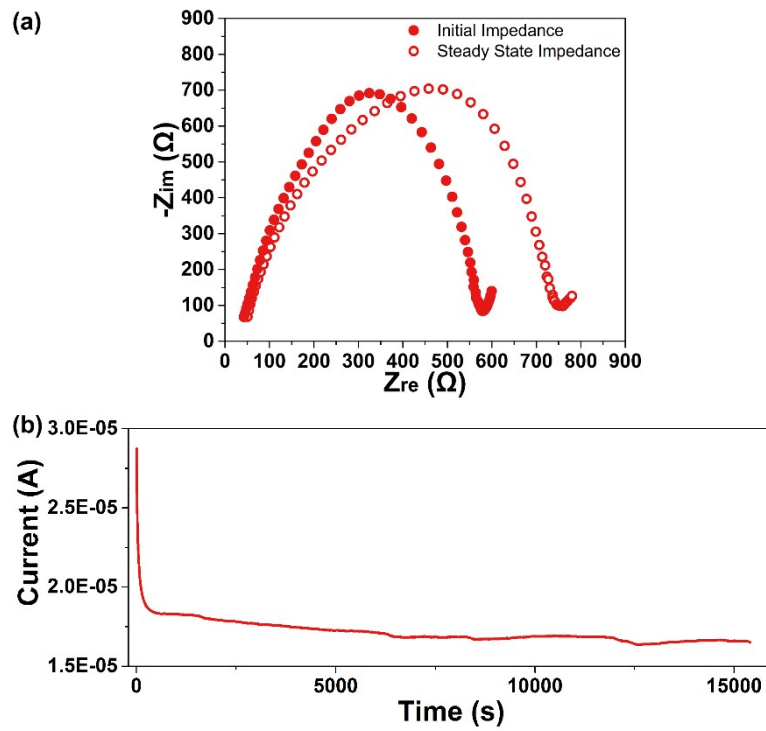

Fig. S5 Measurement of the lithium ion transference number of CPE-IBN20(79)-LiTFSI. (a) Typical Nyquist plot of the AC impedance of a Li|CPE-IBN20(79)-LiTFSI|Li cell at 60 °C; (b) Current variation with time during polarization of the symmetrical lithium cell.
